# Supplementary material for: Structural and Na-ion conduction characteristics of Na3PSxSe4−x
Source: Royal Society of Chemistry journal article supplement (doi:10.1039/c6ta03027k), 2016-01-01
Supplement: c6ta03027k1.pdf [file c6ta03027k1.pdf]

**Structural and Na-ion conduction characteristics of  $\text{Na}_3\text{PS}_x\text{Se}_{4-x}$**

Shou-Hang Bo<sup>a,b</sup>, Yan Wang<sup>a</sup> and Gerbrand Ceder<sup>a,b,c\*</sup>

<sup>a</sup> Department of Materials Science and Engineering, Massachusetts Institute of Technology,  
Cambridge, MA 02139, United States

<sup>b</sup> Materials Science Division, Lawrence Berkeley National Laboratory, Berkeley, CA 94720,  
United States

<sup>c</sup> Department of Materials Science and Engineering, University of California, Berkeley, CA  
94720, United States

## Supporting Information

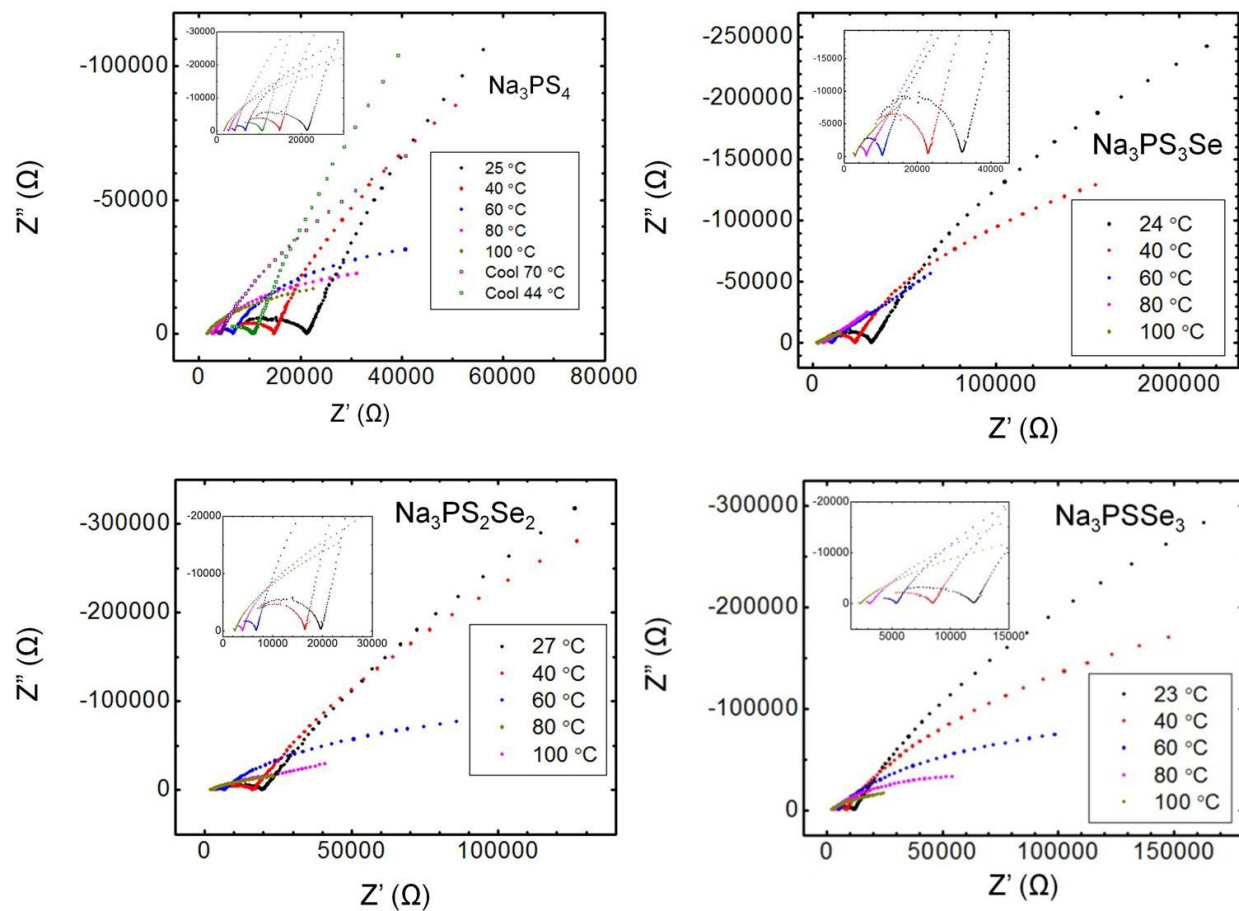

Figure S1. Variable-temperature impedance spectra for  $\text{Na}_3\text{PS}_4$ ,  $\text{Na}_3\text{PS}_3\text{Se}$ ,  $\text{Na}_3\text{PS}_2\text{Se}_2$  and  $\text{Na}_3\text{PSSe}_3$ .

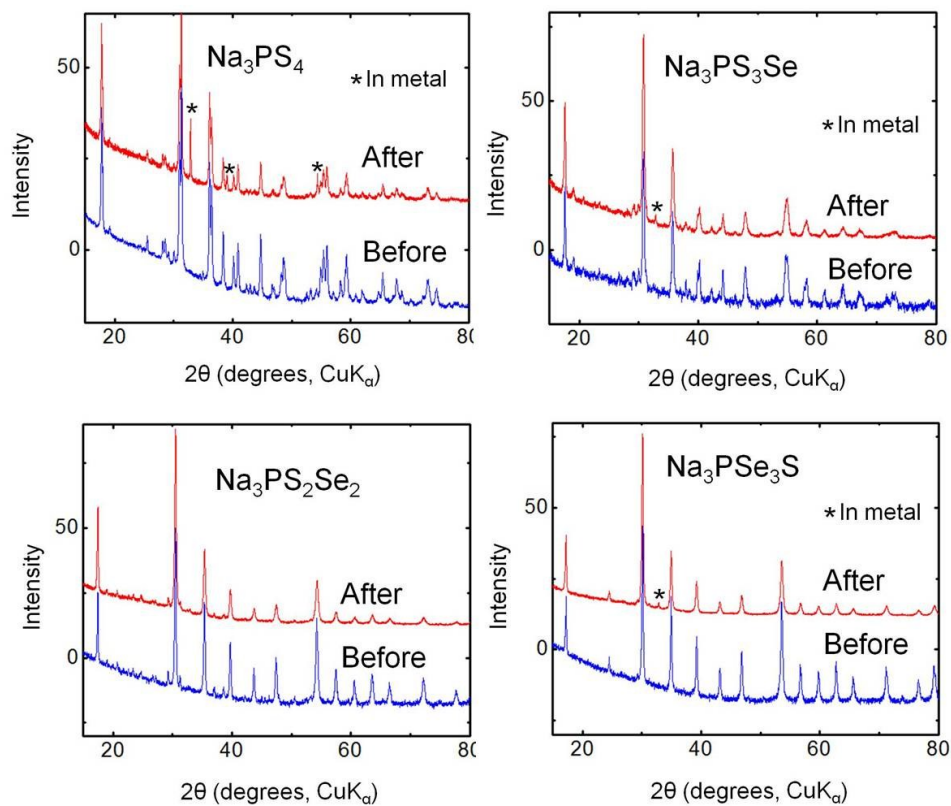

Figure S2. Diffraction patterns of  $\text{Na}_3\text{PS}_4$ ,  $\text{Na}_3\text{PS}_3\text{Se}$ ,  $\text{Na}_3\text{PS}_2\text{Se}_2$  and  $\text{Na}_3\text{PSe}_3\text{S}$ , which were collected before and after the variable-temperature measurements.

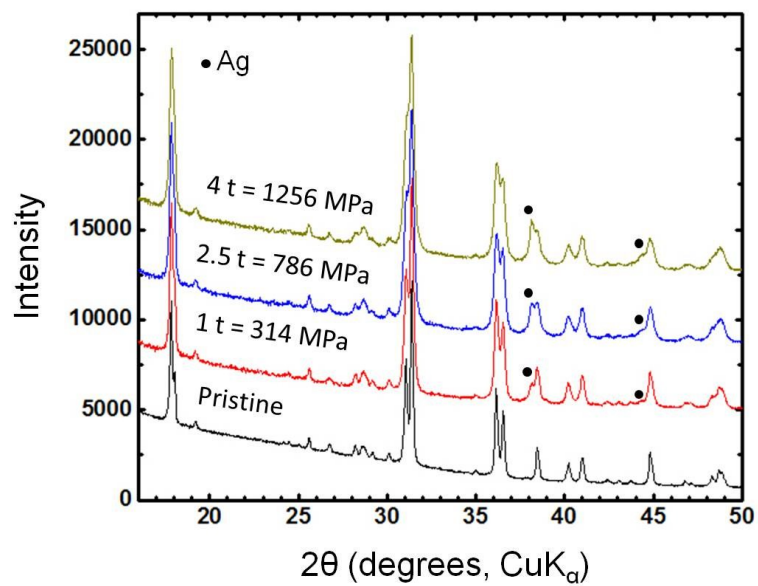

Figure S3. Diffraction patterns of the  $\text{Na}_3\text{PS}_4$  powder samples which were pressed at different pressures. Ag impurity is present, since Ag paste was used as blocking electrodes for the impedance measurements.

**Table S1.** Crystallographic data for Na<sub>3</sub>PS<sub>3</sub>Se based on the Rietveld refinement of the synchrotron X-ray data

|                      |                                                                  |
|----------------------|------------------------------------------------------------------|
| Radiation            | Synchrotron X-ray (11BM, APS)                                    |
| Crystal system       | Tetragonal                                                       |
| Space group          | <i>P</i> -42 <sub>1</sub> <i>c</i> (#114)                        |
| Lattice parameters   | $a = b = 7.06428(4) \text{ \AA}$<br>$c = 7.13193(6) \text{ \AA}$ |
| Cell volume          | 355.912(5) Å <sup>3</sup>                                        |
| Density (calculated) | 2.56686 g/cm <sup>3</sup>                                        |
| $\lambda$            | 0.413991 Å                                                       |
| R <sub>wp</sub>      | 8.614%                                                           |
| R <sub>Bragg</sub>   | 3.609%                                                           |
| $\chi^2$             | 1.377                                                            |

**Table S2.** Atomic site information for Na<sub>3</sub>PS<sub>3</sub>Se

| Atom | Wyck. | $x/a$     | $y/b$     | $z/c$     | Occ.                  | B <sub>iso</sub> (Å <sup>2</sup> ) |
|------|-------|-----------|-----------|-----------|-----------------------|------------------------------------|
| Na1  | 4d    | 0         | 0.5       | 0.0507(3) | 1                     | 5.07(6)                            |
| Na2  | 2b    | 0         | 0         | 0.5       | 1                     | 5.3(1)                             |
| P    | 2a    | 0         | 0         | 0         | 1                     | 1.43(3)                            |
| S/Se | 8c    | 0.1851(1) | 0.1607(1) | 0.1689(1) | S = 0.75<br>Se = 0.25 | 4.96(5)                            |

**Table S3.** Crystallographic data for Na<sub>3</sub>PS<sub>2</sub>Se<sub>2</sub> based on the Rietveld refinement of the synchrotron X-ray data

|                      |                                    |
|----------------------|------------------------------------|
| Radiation            | Synchrotron X-ray (11BM, APS)      |
| Crystal system       | Cubic                              |
| Space group          | <i>I</i> -43 <i>m</i> (#217)       |
| Lattice parameters   | $a = b = c = 7.15665(3)\text{\AA}$ |
| Cell volume          | $366.547(5)\text{\AA}^3$           |
| Density (calculated) | 2.91725 g/cm <sup>3</sup>          |
| $\lambda$            | 0.413991 $\text{\AA}$              |
| R <sub>wp</sub>      | 9.131%                             |
| R <sub>Bragg</sub>   | 2.712%                             |
| $\chi^2$             | 1.321                              |

**Table S4.** Atomic site information for Na<sub>3</sub>PS<sub>2</sub>Se<sub>2</sub>

| Atom | Wyck. | $x/a$      | $y/b$      | $z/c$      | Occ.                | B <sub>iso</sub> ( $\text{\AA}^2$ ) |
|------|-------|------------|------------|------------|---------------------|-------------------------------------|
| Na   | 6b    | 0          | 0.5        | 0.5        | 1                   | 6.24(5)                             |
| P    | 2a    | 0          | 0          | 0          | 1                   | 1.28(3)                             |
| S/Se | 8c    | 0.17299(4) | 0.17299(4) | 0.17299(4) | S = 0.5<br>Se = 0.5 | 2.14(1)                             |

**Table S5.** Crystallographic data for Na<sub>3</sub>PSSe<sub>3</sub> based on the Rietveld refinement of the synchrotron X-ray data

|                      |                                    |
|----------------------|------------------------------------|
| Radiation            | Synchrotron X-ray (11BM, APS)      |
| Crystal system       | Cubic                              |
| Space group          | <i>I</i> -43 <i>m</i> (#217)       |
| Lattice parameters   | $a = b = c = 7.24079(3)\text{\AA}$ |
| Cell volume          | 379.628(4) $\text{\AA}^3$          |
| Density (calculated) | 3.22693 g/cm <sup>3</sup>          |
| $\lambda$            | 0.413991 $\text{\AA}$              |
| R <sub>wp</sub>      | 8.890%                             |
| R <sub>Bragg</sub>   | 2.842%                             |
| $\chi^2$             | 1.371                              |

**Table S6.** Atomic site information for Na<sub>3</sub>PSSe<sub>3</sub>

| Atom | Wyck. | $x/a$      | $y/b$      | $z/c$      | Occ.                  | B <sub>iso</sub> ( $\text{\AA}^2$ ) |
|------|-------|------------|------------|------------|-----------------------|-------------------------------------|
| Na   | 6b    | 0          | 0.5        | 0.5        | 1                     | 5.83(4)                             |
| P    | 2a    | 0          | 0          | 0          | 1                     | 1.38(3)                             |
| S/Se | 8c    | 0.17422(3) | 0.17422(3) | 0.17422(3) | S = 0.25<br>Se = 0.75 | 2.45(1)                             |
